# Supplementary material for: Alterations in Faecal Metagenomics and Serum Metabolomics Indicate Management Strategies for Patients With Budd-Chiari Syndrome
Source: PubMed Central journal article supplement (PMC8567795; doi:10.3389/fcimb.2021.730091), 2021-10-21

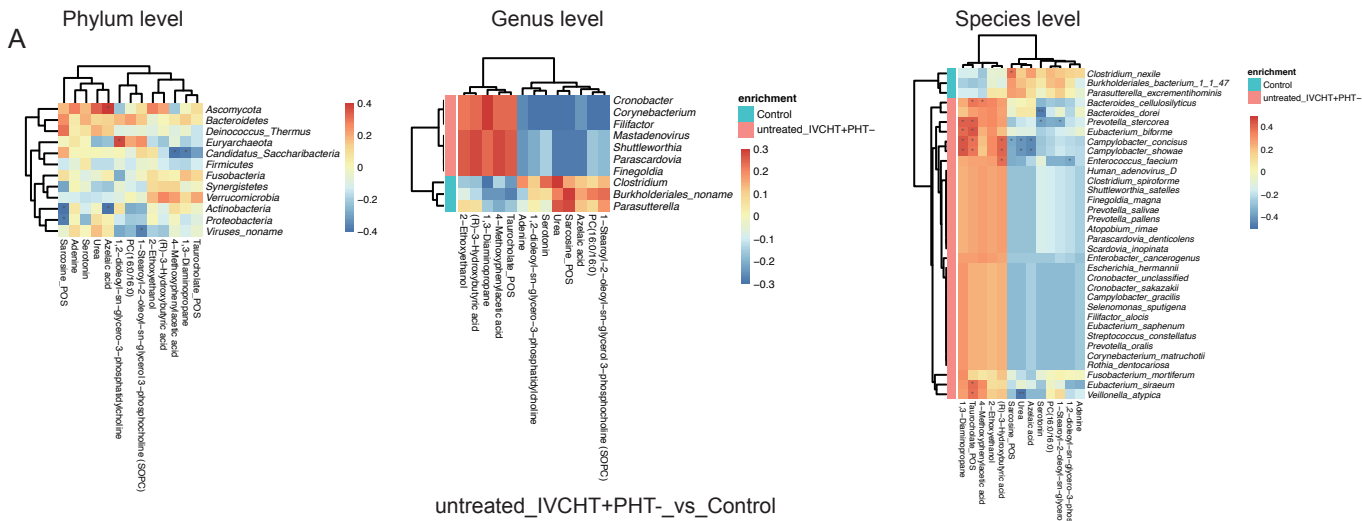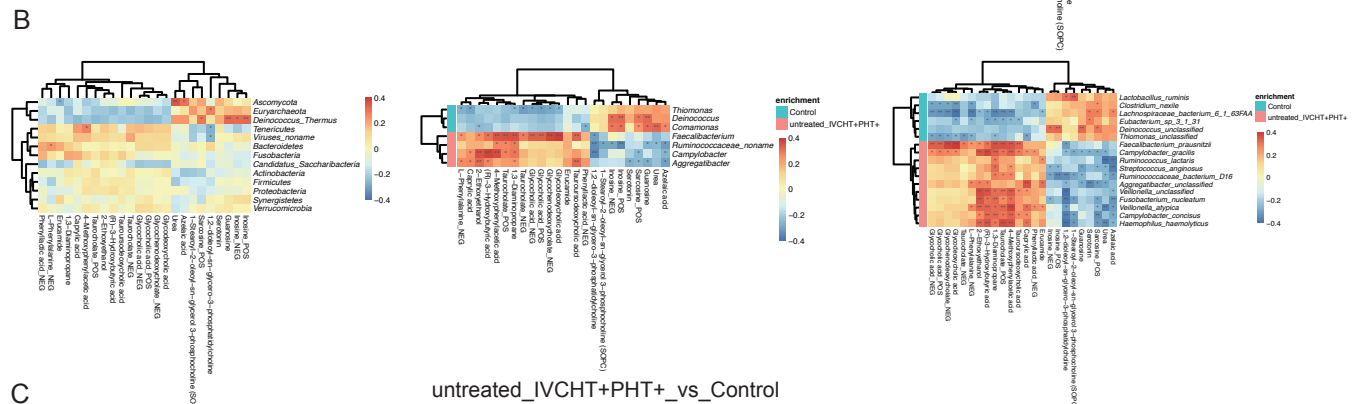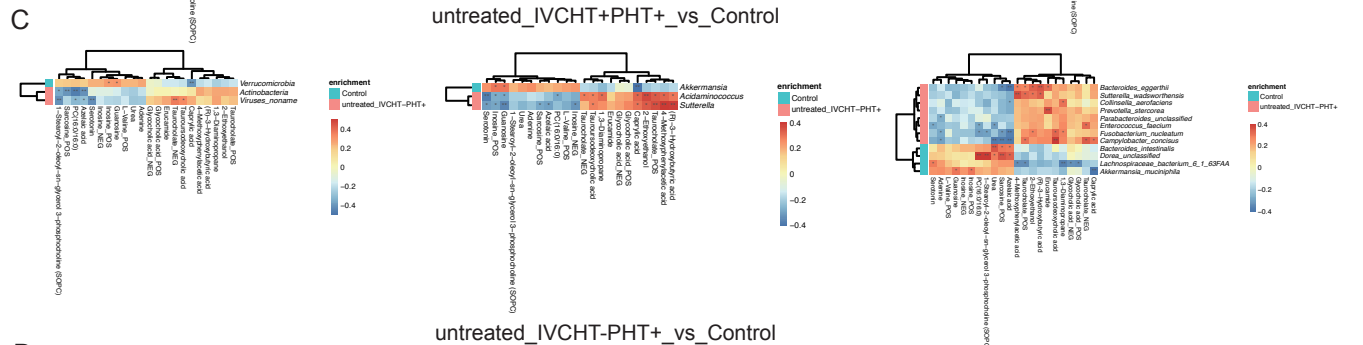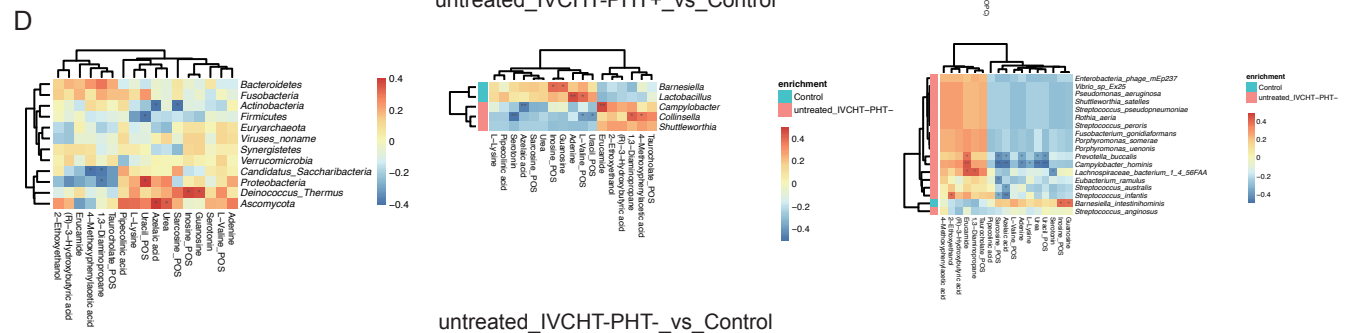

Supplement: Image_2.pdf [file Image_2.pdf]
