# Supplementary material for: Alterations in Faecal Metagenomics and Serum Metabolomics Indicate Management Strategies for Patients With Budd-Chiari Syndrome
Source: PubMed Central journal article supplement (PMC8567795; doi:10.3389/fcimb.2021.730091), 2021-10-21
Supplement: Image_4.pdf [file Image_4.pdf]

## Supplemental Figures Legends

**Supplementary Figure 1** Diversity of B-CS in metagenomics analysis: (A) The number of observations (count) was used to indicate richness and the Shannon index was used to indicate homogeneity. Alpha diversity was not significantly different between patients with B-CS and healthy controls at the gene level ( $P > 0.05$ ). (B) Alpha diversity was not significantly different between patients with B-CS and healthy controls at the species level ( $P > 0.05$ ). (C) At the phylum levels, beta diversity was not significantly different between patients with B-CS and healthy controls ( $P > 0.05$ ). (D) At the genus levels, beta diversity was not significantly different between patients with B-CS and healthy controls ( $P > 0.05$ ). (E) At the species levels, beta diversity was not significantly different between patients with B-CS and healthy controls ( $P > 0.05$ ). (F) At the genes levels, beta diversity was not significantly different between patients with B-CS and healthy controls ( $P > 0.05$ ). B-CS, Budd-Chiari syndrome.

**Supplementary Figure 2** Heat map of correlation analysis between each group of untreated patients with B-CS and healthy controls at phylum, genus, and species level in metagenomics analysis and serum metabolite levels. Significant spearman correlations were shown with \* ( $P < 0.05$ ) and \*\* ( $P < 0.01$ ), enrichment direction is as shown.

B-CS, Budd-Chiari syndrome

**Supplementary Figure 3** Heat map of correlation analysis between each group of untreated B-CS patients and healthy controls at metabolic pathway level and KO level. Taurocholate shows significant positive correlation with *Campylobacter concisus* in the presence of hypertension. Taurocholate also correlated significantly and positively with K00925: Acetatekinase [EC: 2.7.2.1] of *Campylobacter concisus* in the IVCHT+PHT+ population. Significant spearman correlations were shown with \* ( $P < 0.05$ ) and \*\* ( $P < 0.01$ ), enrichment direction as shown.

B-CS, Budd-Chiari syndrome; PHT, portal hypertension; IVCHT, inferior vena caval hypertension; KO, Kyoto Encyclopaedia of Genes and Genomes (KEGG) orthologous groups
